# Supplementary material for: A novel algorithm for analyzing drug-drug interactions from MEDLINE literature
Source: PubMed Central journal article supplement (PMC4661569; doi:10.1038/srep17357), 2015-11-27
Supplement: srep17357-s1.pdf [file srep17357-s1.pdf]

## SUPPLEMENTARY INFORMATION TO

### **A novel algorithm for analyzing drug-drug interactions from MEDLINE literature**

Yin Lu<sup>1</sup>, Dan Shen<sup>2</sup>, Maxwell Pietsch<sup>3</sup>, Chetan Nagar<sup>1</sup>, Zayd Fadli<sup>4</sup>, Hong Huang<sup>5</sup>, Yi Cheng Tu<sup>3</sup>, Feng Cheng<sup>1,6,\*</sup>

<sup>1</sup>Department of Pharmaceutical Science, College of Pharmacy, University of South Florida, Tampa, FL, 33612, USA

<sup>2</sup>Department of Mathematics & Statistics, University of South Florida, Tampa, FL, 33612, USA

<sup>3</sup>Department of Computer Science and Engineering, University of South Florida, Tampa, FL, 33612, USA

<sup>4</sup>College of Medicine, Syrian private university, Damascus, 0100, Syria

<sup>5</sup>School of Information, University of South Florida, Tampa, FL, 33612, USA

<sup>6</sup>Department of Epidemiology and Biostatistics, College of Public Health, University of South Florida, Tampa 33612, USA

\* Correspondence and requests for materials should be addressed to F. C. (email: fcheng1@health.usf.edu)

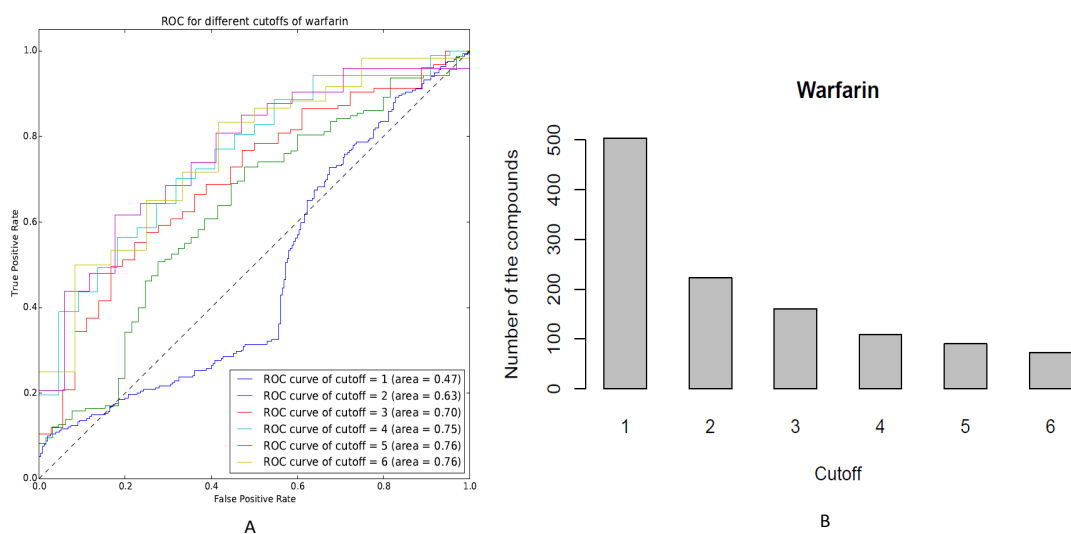

**Supplementary Figure S1.** ROCs and the numbers of obtained compounds v.s. different values of cutoff when taking warfarin as an example via our algorithm ( $p < 0.1$ ). With the augment of cutoff, the area under the curve (AUC) increases (**A**), while the number of obtained compounds decreases (**B**).
